# Supplementary material for: Surface plasmon-enhanced amplified spontaneous emission from organic single crystals by integrating graphene/copper nanoparticle hybrid nanostructures
Source: Royal Society of Chemistry journal article supplement (doi:10.1039/c7nr06750j), 2017-01-01
Supplement: c7nr06750j1.pdf [file c7nr06750j1.pdf]

## Supporting Information

### Surface plasmon-enhanced amplified spontaneous emission from organic single crystal by as-grown graphene/copper nanoparticles hybrid nanostructures

Yun-Fei Li,<sup>a</sup> Jing Feng,<sup>\*a</sup> Feng-Xi Dong,<sup>a</sup> Ran Ding,<sup>a</sup> Zhen-Yu Zhang,<sup>a</sup> Xu-Lin Zhang,<sup>a</sup> Yang Chen,<sup>a</sup> Yan-Gang Bi,<sup>a</sup> and Hong-Bo Sun<sup>a,b</sup>

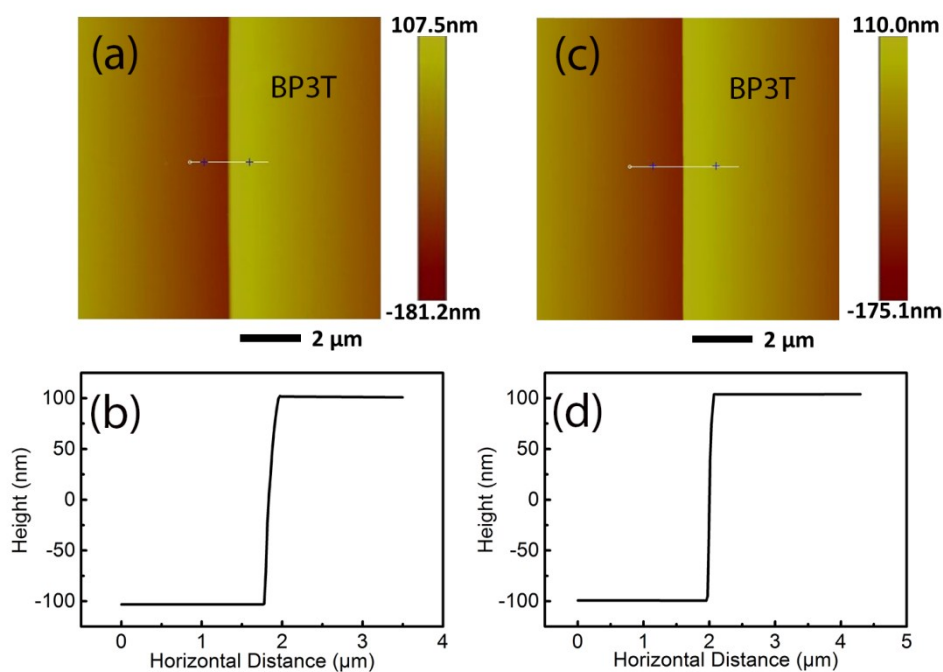

**Fig. S1** AFM images and height illustrations of BP3T crystals integrated on Cu NPs with (a)-(b) and without (c)-(d) graphene coating.

|                         | $\tau_1$            | $\tau_2$            | $\tau_{ave}$ |
|-------------------------|---------------------|---------------------|--------------|
| BP3T on graphene/Cu NPs | 1.01 ns<br>(86.94%) | 9.05 ns<br>(13.06%) | 2.06 ns      |
| BP3T on Cu NPs          | 1.38 ns<br>(80.30%) | 9.35 ns<br>(19.7%)  | 2.95 ns      |
| BP3T on quartz          | 1.55 ns<br>(76.77%) | 9.73 ns<br>(23.23%) | 3.48 ns      |

**Table S1.** Best-fit parameters of time-resolved PL decay for BP3T crystals on graphene/Cu NPs, Cu NPs and quartz.

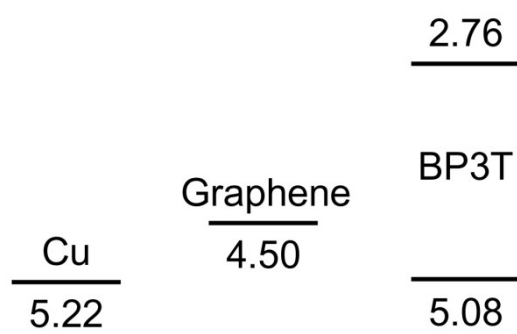

**Fig. S2** Schematics of the band diagram of Cu-graphene-BP3T.

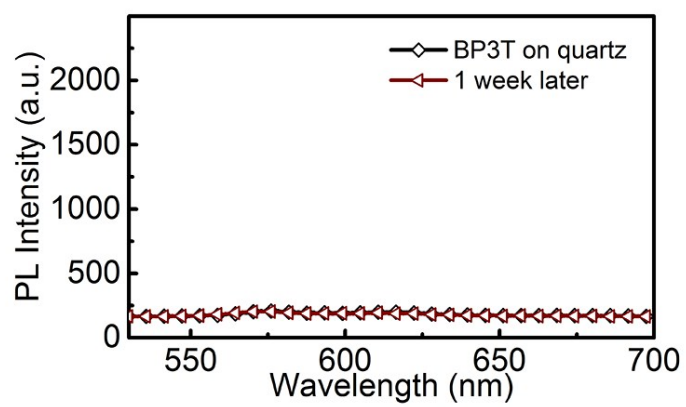

**Fig. S3** Time evolutions of photoluminescence (PL) spectra of BP3T crystals on quartz under the illumination of femtosecond pump beam.
